1         **A needle in a haystack: metagenomic DNA sequencing to quantify *Mycobacterium***  
2                                 ***tuberculosis* DNA and diagnose tuberculosis**

3  
4         Adrienne Chang<sup>1</sup>, Omary Mzava<sup>1</sup>, Liz-Audrey Djomnang Kounatse<sup>1</sup>, Joan Lenz<sup>1</sup>, Philip  
5         Burnham<sup>1</sup>, Peter Kaplinsky<sup>1</sup>, Alfred Andama<sup>2</sup>, John Connelly<sup>3</sup>, Christine M. Bachman<sup>3</sup>, Adithya  
6         Cattamanchi<sup>4</sup>, Amy Steadman<sup>3</sup>, Iwijn De Vlaminck<sup>1\*</sup>

7  
8         **Affiliations:**

9         <sup>1</sup>Nancy E. and Peter C. Meinig School of Biomedical Engineering, Cornell University, Ithaca, New York,  
10         USA

11         <sup>2</sup>Department of Internal Medicine, Makerere University College of Health Sciences, Kampala, Uganda

12         <sup>3</sup>Global Health Labs, Bellevue, Washington, USA

13         <sup>4</sup>Department of Medicine, University of California San Francisco, San Francisco, California, USA

14  
15         \*Corresponding author at: vlaminck@cornell.edu

16  
17         **ABSTRACT**

18         **Background**

19         Tuberculosis (TB) remains a significant cause of mortality worldwide. Metagenomic next-  
20         generation sequencing has the potential to reveal biomarkers of active disease, identify  
21         coinfection, and improve detection for sputum-scarce or culture-negative cases.

22         **Methods**

23         We conducted a large-scale comparative study of 427 plasma, urine, and oral swab samples  
24         from 334 individuals from TB endemic and non-endemic regions to evaluate the utility of a  
25         shotgun metagenomic DNA sequencing assay for tuberculosis diagnosis.

26         **Findings**

27         We found that the choice of a negative, non-TB control cohort had a strong impact on the  
28         measured performance of the diagnostic test: the use of a control patient cohort from a  
29         nonendemic region led to a test with nearly 100% specificity and sensitivity, whereas controls  
30         from TB endemic regions exhibited a high background of nontuberculous mycobacterial DNA,  
31         limiting the diagnostic performance of the test. Using mathematical modeling and quantitative  
32         comparisons to matched qPCR data, we found that the burden of *Mycobacterium tuberculosis*  
33         DNA constitutes a very small fraction (0.04 or less) of the total abundance of DNA originating  
34         from mycobacteria in samples from TB endemic regions.

## 36 Interpretation

37 Our findings suggest that the utility of a metagenomic sequencing assay for tuberculosis  
38 diagnostics is limited by the low burden of *M. tuberculosis* in extrapulmonary sites and an  
39 overwhelming biological background of nontuberculous mycobacterial DNA.

## 40 Funding

41 This work was supported by the National Institutes of Health, the Rainin Foundation, the  
42 National Science Foundation, and the Bill and Melinda Gates Foundation.

43

44

## 45 Introduction

46 Despite the introduction of the World Health Organization's (WHO) End TB Strategy in 2015,  
47 tuberculosis (TB) remains one of the top global causes of death due to a single infectious  
48 pathogen. In 2021, the WHO reported the first rise in deaths due to tuberculosis in over a  
49 decade.<sup>1</sup> Recent advances in nucleic acid amplification tests, including the WHO-recommended  
50 Xpert® MTB/RIF Ultra, have produced rapid tests with high positive predictive value<sup>2</sup>. However,  
51 these assays are unable to replace the use of culture for bacteriological confirmation due to low  
52 negative predictive value or implementation barriers present in low- and middle-income  
53 countries that account for 98% of reported TB cases<sup>1</sup>. Though sputum culture has long been a  
54 gold standard for TB diagnostics, the time to positive detection can be affected by a number of  
55 variables, including sputum volume, population characteristics (e.g. age, HIV coinfection), and  
56 method of specimen handling<sup>3,4</sup>. Variations due to these factors can lead to discrepancies  
57 between quantitative and semiquantitative diagnostic assays. Thus, there is an unmet need for  
58 robust, point-of-care tuberculosis diagnostics.

59

60 Metagenomics DNA sequencing has the capacity to detect all potential infectious pathogens in  
61 a clinical sample using an unbiased approach. Numerous studies have demonstrated that DNA  
62 from *Mycobacterium tuberculosis*, the causative agent of tuberculosis, can be detected in  
63 plasma, urine, and oral fluids<sup>5-7</sup>. However, its diagnostic performance in distinguishing positive  
64 sputum culture from negative sputum culture samples has fallen short of the performance  
65 standards set by the WHO (98% specificity, 80% sensitivity)<sup>8</sup>. We explored the utility of a  
66 metagenomic sequencing assay for tuberculosis across three biofluids and four geographic  
67 regions and found that diagnostic performance is highly influenced by the geographic origin of  
68 the control cohort (**Fig 1**). Using simulation and modeling, we found that the diagnostic  
69 performance is correlated with the abundance of *M. tuberculosis* DNA relative to the

70 background of DNA from nontuberculous mycobacteria. The background of DNA originating  
71 from nontuberculous mycobacteria is low in samples from TB non-endemic regions but  
72 overwhelms and obscures the *M. tuberculosis* signal in samples from TB endemic regions. Our  
73 study provides insight into the burden and properties of *M. tuberculosis* in different biofluids and  
74 can inform the development of molecular tests that achieve the requisite standards for  
75 sensitivity and specificity.

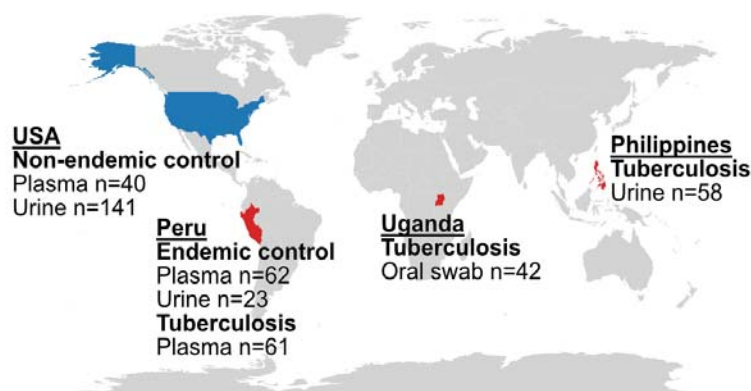

76  
77 **Figure 1.** Geographic distribution of samples included in this study. High tuberculosis burden countries  
78 are shaded in red.

79  
80 **Results**

81 *Biophysical properties of M. tuberculosis DNA in urine, plasma, and oral swabs*

82 Microbial cell-free DNA (cfDNA) in urine and plasma has been shown to be ultrashort, with an  
83 average fragment length of less than 100 bp (**Fig 2A**)<sup>9,10</sup>. Compared to these biofluids, relatively  
84 few studies have examined the properties and diagnostic potential of microbial DNA from oral  
85 swabs. Oral swabs samples are an attractive new avenue for metagenomic DNA assays  
86 because they can be obtained noninvasively, are more cost effective than obtaining, storing,  
87 and shipping blood samples, and provide a high yield of DNA<sup>11</sup>. We found that in contrast to the  
88 microbial fragment length profiles of urinary and plasma cfDNA, DNA obtained from oral swabs  
89 is longer and likely genomic in origin: the fragmentation pattern closely mirrors that of human  
90 chromosomal DNA which arises from the tagmentation step in the library preparation protocol  
91 (**Fig 2B**).

92  
93 We set out to quantify the abundance of *M. tuberculosis* DNA detected in 161 samples obtained  
94 from patients presenting with symptoms of respiratory illness at tuberculosis clinics in the  
95 Philippines and Uganda (tuberculosis cohort), approximately half of which were sputum positive  
96 for tuberculosis (**Table 1**). We found that the abundance of *M. tuberculosis* DNA increases from

97 plasma, to urine, to oral swabs (**Fig 2C**). Within the tuberculosis cohort, there was no difference  
98 in *M. tuberculosis* DNA abundance between sputum positive and sputum negative tuberculosis  
99 samples. Setting a limit of detection of 0.1 molecule per million reads (MPM), we find that within  
100 the tuberculosis cohort we detect *M. tuberculosis* DNA in 100% of the oral swab samples  
101 (42/42), 95% of the urine samples (55/58), and 93% of the plasma samples (57/61). The median  
102 abundance of *M. tuberculosis* DNA in the tuberculosis cohort was 0.512, 2.29, and 25.5 MPM  
103 for plasma, urine, and oral swabs, respectively. Further, we found an average of 27.9-fold more  
104 (adjusted p-value =  $3.3 \times 10^{-16}$ , Wilcoxon test) *M. tuberculosis* molecules in the oral swab  
105 samples than in plasma samples.

106  
107 As a point of comparison, we quantified the abundance of *M. tuberculosis* in plasma and urine  
108 samples from two additional cohorts: 1) 141 urine samples and 40 plasma samples from  
109 patients living in the United States who received kidney or lung transplants, respectively<sup>12-</sup>  
110 <sup>14</sup>(non-endemic cohort); and, 2) 62 plasma samples and 23 urine samples from pediatric  
111 patients with suspected environmental enteropathy in Peru, a TB endemic region (endemic  
112 cohort). We found no *M. tuberculosis* DNA signatures in 38/40 plasma non-endemic samples  
113 and 89/141 urine non-endemic samples. In contrast, *M. tuberculosis* DNA was detected in 57/62  
114 plasma samples and 16/23 urine samples from the endemic cohort. The median abundance of  
115 *M. tuberculosis* DNA in the endemic cohort was 1.26 and 1.85 MPM in plasma and urine  
116 samples, respectively. The higher abundance of *M. tuberculosis* DNA in the endemic cohort  
117 relative to the non-endemic cohort was expected given that geography, ethnicity, and other  
118 population-based factors have previously been shown to influence the microbiome composition  
119 among healthy individuals<sup>15</sup>, and that the presence of an infectious organism does not  
120 necessarily equate to a disease state<sup>16</sup>. Given that the abundance of *M. tuberculosis* DNA  
121 across all biofluids in the endemic cohort was over 3.7-fold more than the non-endemic cohort  
122 (adjusted p-value =  $3.4 \times 10^{-14}$ , Wilcoxon test), but still significantly less than the tuberculosis  
123 cohort (12.15-fold less across all biofluids; adjusted p-value =  $7 \times 10^{-4}$ , Wilcox test).

124

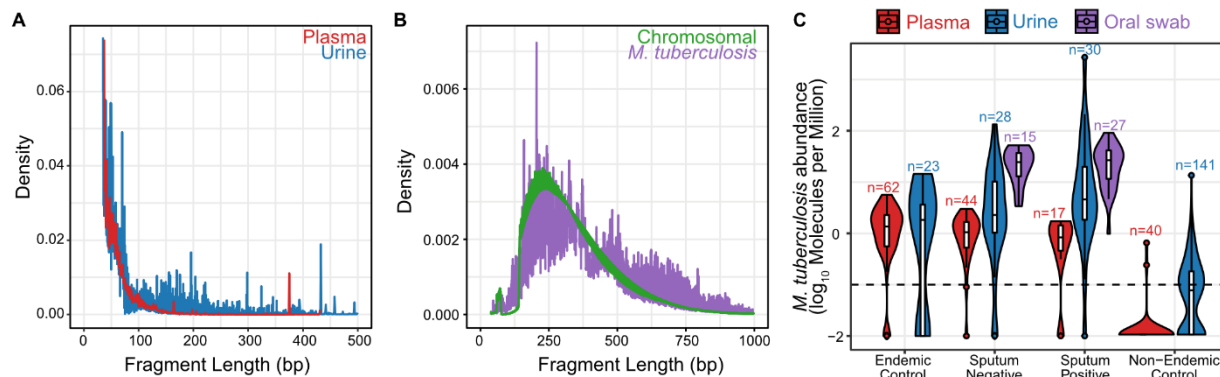

125  
126 **Figure 2. A** The fragment length distributions of *M. tuberculosis* DNA in plasma (red) and urine (blue). **B**  
127 The fragment length distribution of *M. tuberculosis* DNA (purple) and host chromosomal DNA (green) in  
128 oral swabs are similar, suggesting that the microbial DNA is genomic and the fragmentation profile is not  
129 an intrinsic property but rather the consequence of sample preparation steps. **C** The abundance of *M.*  
130 *tuberculosis* DNA across all cohorts and biofluids. The majority of non-endemic samples have little to no  
131 detectable *M. tuberculosis* DNA, while the abundance of *M. tuberculosis* DNA in endemic and  
132 tuberculosis samples increases from plasma to oral swab. Dashed line indicates a limit of detection cutoff  
133 of 0.1 MPM.

134

### 135 *Diagnostic potential of M. tuberculosis DNA is influenced by choice of controls*

136 We evaluated the diagnostic performance of *M. tuberculosis* DNA in oral swabs, plasma, and  
137 urine. We found poor separation between sputum positive and sputum negative individuals  
138 across all biofluid types (area under the curve [AUC] = 0.6, 0.6, and 0.5 for plasma, urine, and  
139 oral swabs, respectively; **Fig 3A**). We found a modest increase in performance when comparing  
140 the tuberculosis and endemic cohorts (AUC = 0.62 and 0.64 for urine and plasma, respectively;  
141 **Fig 3B**). In contrast, we found almost perfect separation for the tuberculosis and non-endemic  
142 cohorts (AUC = 0.93 and 0.97 for urine and plasma, respectively; **Fig 3C**). Moreover, we found  
143 that the diagnostic performance was not influenced by the choice of metagenomic classifier,  
144 reference database, or removal of confounding reads (see **Table S1-S2**, and Supplemental  
145 Information).

146

147 To explore the effects of a biological background on the diagnostic performance, we randomly  
148 selected combinations of 15 urine samples composed of sputum positive and a known mixture  
149 of sputum negative and non-endemic controls. We performed 50 sampling rounds and found a  
150 positive correlation between the proportion of non-endemic samples and the diagnostic  
151 performance, with a mean AUC of 0.57 when the negative control consisted of only sputum  
152 negative samples and a mean AUC of 0.95 when the negative control was composed entirely of

153 non-endemic samples (**Fig 3D**). However, we saw no correlation when we performed the same  
154 analysis using a mixture of sputum negative tuberculosis and endemic controls: the area under  
155 the curve remained relatively constant, fluctuating between 0.56 and 0.60 across all negative  
156 control mixtures of sputum negative and endemic samples. This observation highlights a crucial  
157 but often overlooked criterium for metagenomic diagnostic test development: the choice of  
158 control. Differences in diagnostic performance are highly influenced by the geographic origin of  
159 the samples. This is supported by the performance of published studies assaying nucleic acids  
160 in blood or urine for tuberculosis diagnosis: sputum culture positive and sputum culture negative  
161 samples are nearly indistinguishable unless the control cohort include samples from individuals  
162 living in TB non-endemic regions (**Table S3**).  
163

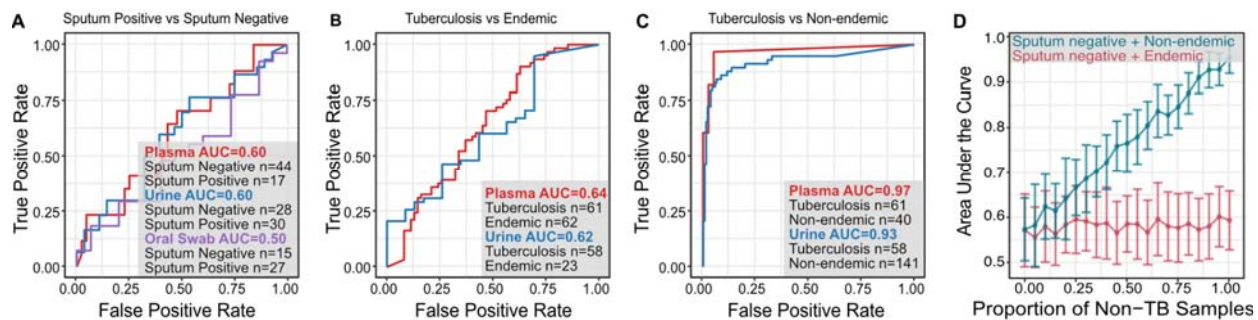

164 **Figure 3.** The performance of the metagenomic assay in discriminating **A** sputum positive versus sputum  
165 negative samples, **B** tuberculosis versus endemic cohorts, and **C** tuberculosis versus non-endemic  
166 cohorts (AUC = area under the curve). **D** Evaluating the effects of incorporating non-endemic samples  
167 (blue) and endemic samples (red) on the diagnostic performance via simulation show that the inclusion of  
168 non-endemic samples skews the assay's sensitivity.  
169

170  
171 *Poor diagnostic performance can be attributed to a background of biological nontuberculous*  
172 *mycobacteria*

173 We hypothesized that the poor diagnostic performance could be attributed to geographic  
174 factors: individuals living in TB endemic regions are exposed to nontuberculous mycobacteria,  
175 such as *M. avium*, *M. abscessus*, and *M. kansasii*<sup>17</sup>. This is further supported by observations  
176 that the abundance of *M. tuberculosis* DNA is positively correlated with age (**Fig S1**). This  
177 exposure results in a nontuberculous mycobacteria background that is indistinguishable from a  
178 true disease signal due to the low abundance of *M. tuberculosis* and the high sequence  
179 similarity between *Mycobacterium* genomes, which can exceed 99% nucleotide similarity<sup>18</sup>.

180



181 To determine whether the poor diagnostic performance could be attributed to a biological  
182 nontuberculous mycobacteria background, we simulated datasets by digitally spiking in *M.*  
183 *tuberculosis* reads into datasets generated for non-endemic, endemic, and tuberculosis urine  
184 samples. Across a range of 0 to 1000 spiked-in *M. tuberculosis* reads, we obtained nearly  
185 perfect classification of the synthetic reads in non-endemic samples ( $0.987 \pm 0.0210$ ; **Fig 4A**).  
186 However, the endemic and tuberculosis samples exhibited logarithmic relationships between the  
187 number of spiked-in reads and precision. When we evaluated precision as a function of the  
188 relative coverage of spiked-in *M. tuberculosis* reads to all *Mycobacterium* reads in a sample, we  
189 found a strong correlation between the signal-to-noise ratio and the classification precision (**Fig**  
190 **4B**). Non-endemic samples had little to no background DNA from *Mycobacterium* species and  
191 exhibited high precision, while endemic and tuberculosis samples had a higher background of  
192 nontuberculous mycobacteria that reduced the classification precision. To further test our  
193 hypothesis that background nontuberculous mycobacterial DNA drives poor classification  
194 precision, we removed all *Mycobacterium* reads prior to spiking in *M. tuberculosis*, *M. bovis*, or  
195 *M. avium* reads and found perfect classification across all samples, regardless of the number of  
196 reads simulated (**Tables S4-S6**).  
197

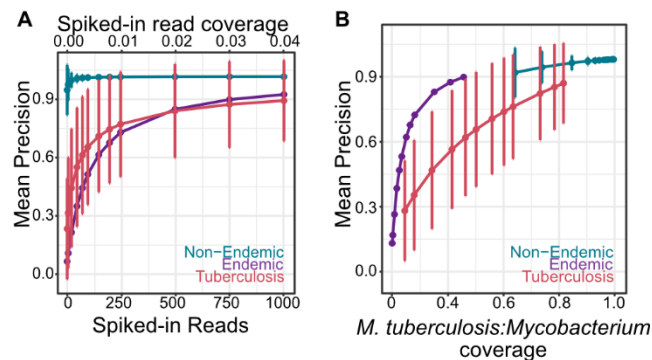

198  
199 **Figure 4. A** Classification precision of synthetic *M. tuberculosis* reads spiked into non-endemic urine  
200 samples (n=29, 5 replicates per sample), endemic urine samples (n=23, 5 replicates per sample), and  
201 tuberculosis urine samples (n=66, 5 replicates per sample). **B** The classification precision is correlated  
202 with the relative coverage of *M. tuberculosis* to total *Mycobacterium* in the sample.

203  
204 The availability of sputum PCR results for the oral swab samples provided further opportunity to  
205 evaluate the *M. tuberculosis* signal relative to the nontuberculous mycobacterial background.  
206 The Xpert® MTB/RIF Ultra assay (Cepheid, Sunnyvale, USA) targets three segments of the *M.*  
207 *tuberculosis* complex, two of which are the IS6110 and IS1081 insertion sequences. *M.*  
208 *tuberculosis* isolates contain between 0-25 copies of IS6110<sup>19</sup>, whereas the IS1081 is present in

209 all *M. tuberculosis* complex species at a stable number of 5-7 repeats per genome<sup>20</sup>. We  
210 evaluated the presence of IS1081 detected by metagenomic sequencing because the range in  
211 copy numbers across different *M. tuberculosis* complex species is narrower. IS1081 was  
212 detected by metagenomic sequencing in 5 of 27 sputum positive oral swab samples and was  
213 not detected in any of the 15 sputum negative oral swab samples, as expected. Because  
214 IS1081 is unique to *M. tuberculosis*, we were able to obtain a lower bound of the relative  
215 abundance of *M. tuberculosis* versus *Mycobacterium* by comparing the per-base sequence  
216 coverage of the IS1081 gene segment relative to the *M. tuberculosis* genome. Using the  
217 minimum copy number for the IS1081 gene (five copies per genome), we found that the  
218 coverage of nontuberculous mycobacteria relative to IS1081 was 210.397 (range of relative  
219 coverage: 23-394). Given that IS1081 was not detected in 22 of the 27 sputum positive oral  
220 swab samples and was not detected in any of the 15 sputum negative oral swab samples, this  
221 range represents a lower bound. Thus, the burden of *M. tuberculosis* DNA represents 4.4% or  
222 less of the total abundance of *Mycobacterium* DNA, indicating a significant background of  
223 nontuberculous mycobacteria. Using species-specific insertion sequences revealed that the  
224 background of *Mycobacterium* originates from a number of species, all of which are both  
225 ubiquitous environmental mycobacteria and implicated in nontuberculous mycobacterial lung  
226 infections (*M. branderi*, *M. smegmatis*, *M. avium*, *M. celatum*, *M. gordonae*, *M. xenopi*, *M.*  
227 *fortuitum*, *M. ulcerans*; **Table S7**)<sup>17,21</sup>. Further validation is required to determine if these species  
228 are co-infectious and influence disease outcome.

229

## 230 **Discussion**

231 We show that the utility of a metagenomic sequencing assay for tuberculosis diagnostics is  
232 dependent on the geographic origin of control samples and limited by the low abundance of *M.*  
233 *tuberculosis* in extrapulmonary sites. Such an assay is sensitive to the detection of  
234 nontuberculous mycobacteria that arises from a lifelong exposure to species from the  
235 *Mycobacterium* genus and contributes to the microbiome composition of samples originating  
236 from TB endemic regions. Our findings demonstrate that the influence of geography on the  
237 microbiome directly impacts the diagnostic performance: the inclusion of non-endemic samples  
238 as controls invariably results in a near perfect test while poor diagnostic separation is obtained  
239 when endemic samples are employed as controls. Mathematical modeling demonstrates that  
240 the diagnostic potential is correlated with the abundance of *M. tuberculosis* DNA relative to the  
241 background of nontuberculous mycobacterial DNA. Quantitative comparisons to matched  
242 qPCR reveals that nontuberculous mycobacterial DNA is 23-fold or more abundant than the



243 abundance *M. tuberculosis* DNA in the samples investigated here. The overwhelming biological  
244 background of *Mycobacterium* in samples of interest, in combination with the low abundance of  
245 *M. tuberculosis* in extrapulmonary sites, presents a major barrier for the implementation of an  
246 unbiased metagenomic DNA sequencing assay for tuberculosis diagnostics.

247  
248 Detection of tuberculosis using a metagenomic sequencing assay for tuberculosis diagnostics is  
249 thus akin to looking for a needle in a haystack: *M. tuberculosis* DNA constituted less than 4.4%  
250 of the total abundance of *Mycobacterium* in samples from TB endemic regions included in this  
251 study. Our work suggests that the median abundance of *M. tuberculosis* is lower than 0.06 and  
252 0.42 copies/mL in blood and urine, respectively, and lower than 284 genome copies/ $\mu$ g of DNA  
253 collected by oral swab, an estimate that is in agreement with previous reports quantifying the  
254 abundance of *M. tuberculosis* DNA through sequence-specific amplification<sup>7,22</sup>. Improvements to  
255 a metagenomic sequencing assay for tuberculosis diagnostics could be made by increasing the  
256 volume of input biofluid<sup>23</sup>, choosing a sample preparation workflow with improved DNA  
257 extraction and short read amplification<sup>10,22</sup>, or enriching for *M. tuberculosis*-specific sequences  
258 using ultrashort PCR amplicons<sup>7,24</sup>. These approaches would minimize noise from  
259 nontuberculous mycobacteria and increase the sequencing budget allocated to *M. tuberculosis*.  
260 Additionally, further exploration of the nontuberculous mycobacteria fraction may reveal patterns  
261 in disease outcome and provide new insights in the development of a robust geographic control.  
262 Together, our results reveal challenges and opportunities for the development of a DNA-based  
263 diagnostic tests for tuberculosis and provides a comprehensive characterization of *M.*  
264 *tuberculosis* in extrapulmonary sites that can inform the development of molecular tests.

265

## 266 **Methods**

### 267 *Study cohorts*

268 A total of 427 datasets from plasma, urine, and oral swab samples were analyzed, 188 of which  
269 were generated for this study (Table 2). Endemic plasma and urine samples were collected from  
270 patients seeking treatment for environmental enteropathy in Peru. The study was approved by  
271 the Johns Hopkins Bloomberg School of Public Health Institutional Review Board (protocol  
272 00002185) and the Cornell University Institutional Review Board (protocol 1612006853).  
273 Tuberculosis plasma samples were collected from patients presenting with respiratory  
274 symptoms from tuberculosis clinics in Peru. The study was approved by the Foundation for  
275 Innovative New Diagnostics' Clinical Trials Review Committee and the Cornell Institutional  
276 Review Board (protocol 1612006851). Oral swab samples were collected from individuals who

277 presented with symptoms of respiratory illness at outpatient clinics in Uganda. The study was  
 278 approved by the Makerere University School of Medicine Research and Ethics Committee  
 279 (protocol 2017-020).

280  
 281 Additional datasets collected in the scope of previous studies were included as follows. Non-  
 282 endemic urine samples were collected from kidney transplant patients who received care at  
 283 New York Presbyterian Hospital-Weill Cornell Medical Center. The study was approved by the  
 284 Weill Cornell Medicine Institutional Review Board (protocols 9402002786, 1207012730,  
 285 0710009490)<sup>12</sup>. Non-endemic plasma samples were collected from lung transplant patients who  
 286 received care at Stanford University Hospital. The study was approved by the Stanford  
 287 University Institutional Review Board (protocol 17666)<sup>13,14</sup>. Tuberculosis urine samples from  
 288 patients seeking treatment for tuberculosis in the Philippines were collected through a study  
 289 partly funded by the Department of Science and Technology - Philippine Council for Health  
 290 Research and Development (DOST-PCHR). This study was approved by the University of the  
 291 Philippines Manila Research Ethics Board (protocol UPMREB 2018-252-01)<sup>10</sup>. All patients  
 292 provided written informed consent.

293  
 294 **Table 1.** Overview of datasets included in this study. All data was generated for this study unless  
 295 otherwise indicated.

| Cohort       | Origin                    | Disease                          | Biofluid | Patients | Samples |
|--------------|---------------------------|----------------------------------|----------|----------|---------|
| Endemic      | Peru                      | Environmental enteropathy        | Plasma   | 62       | 62      |
|              |                           |                                  | Urine    | 23       | 23      |
| Non-endemic  | USA                       | Kidney transplant <sup>12</sup>  | Urine    | 82       | 141     |
|              |                           | Lung transplant <sup>13,14</sup> | Plasma   | 6        | 40      |
| Tuberculosis | Philippines <sup>10</sup> | Sputum positive                  | Urine    | 30       | 30      |
|              |                           | Sputum negative                  | Urine    | 28       | 28      |
|              | Peru                      | Sputum positive                  | Plasma   | 17       | 17      |

|  |        |                 |           |    |    |
|--|--------|-----------------|-----------|----|----|
|  |        | Sputum negative | Plasma    | 44 | 44 |
|  | Uganda | Sputum positive | Oral swab | 27 | 27 |
|  |        | Sputum negative | Oral swab | 15 | 15 |

296

297

298 *Sample collection*

299 Urine samples were collected via the conventional clean-catch midstream method. For the  
300 endemic cohort, approximately 50 mL of urine was centrifuged at 3,000 x g on the same day for  
301 30 minutes and the supernatant was stored in 1 mL aliquots at -80°C. For the tuberculosis  
302 cohort, approximately 10 mL of urine was mixed with 2 mL Streck Cell-Free DNA Urine  
303 Preserve (Streck, Cat #230604) and centrifuged at 3,000 x g for 30 minutes at ambient  
304 temperature within 30 minutes of specimen collection. The supernatant was similarly stored in 1  
305 mL aliquots at -80°C.

306

307 Peripheral blood samples were collected in EDTA. Plasma was separated by centrifugation at  
308 1,600 x g for 10 minutes followed by centrifugation at 16,000 x g for 10 minutes. Plasma was  
309 stored in 1 mL aliquots at -80°C.

310

311 Oral swab samples were collected by swabbing the tongue for 15 seconds with rotation using a  
312 Copan regular flocked swab with molded breakpoint at 30 mm (Copan, Cat #520CS01). The  
313 swab head was then broken off into a collection tube containing 1X TE buffer, vortexed for 30  
314 seconds, and stored at -80°C.

315

316 *DNA isolation and library preparation*

317 DNA was extracted from plasma and urine using the QIAamp Circulating Nucleic Acid Kit  
318 according to the manufacturer's instructions (Qiagen, Cat #55114). Sequencing libraries were  
319 prepared using a single-stranded library preparation as described in Burnham et al<sup>9</sup>. DNA was  
320 extracted from oral swab samples using the QIAamp UCP Pathogen Kit according to the  
321 manufacturer's instructions (Qiagen, Cat #50214) and libraries were prepared using the Nextera  
322 XT DNA Library Prep Kit (Illumina, Cat #FC-131-1024). All libraries were characterized using

323 the AATI Fragment Analyzer before pooling and sequencing on the Illumina NextSeq 500  
324 platform (paired-end, 2x75 bp).

325

### 326 *Fragment length distribution and quantification of M. tuberculosis*

327 Low-quality bases and Illumina-specific sequences were trimmed (Trimmomatic-0.32,  
328 LEADING:25 TRAILING:25 SLIDINGWINDOW:4:30 MINLEN:15)<sup>25</sup>. Reads were aligned (BWA-  
329 mem<sup>26</sup>) to the human reference (UCSC hg19). Reads that did not align to the human genome  
330 reference were extracted and aligned to the bacteriophage phiX174.

331

332 To obtain the fragment length distribution for *M. tuberculosis* DNA, unaligned reads were  
333 extracted again and aligned to the circularized *M. tuberculosis* H37Rv genome (edited from  
334 NC\_000962.3). Reads aligning with a minimum mapping quality of 30 were extracted, and the  
335 lengths computed as the absolute difference between the start and end coordinates. The  
336 fragment length density profile was computed using the *hist* function from the R Graphics  
337 Package.

338

339 To quantify the abundance of *M. tuberculosis*, reads that did not align to the human and phiX  
340 references were extracted and aligned to a curated list of bacterial and viral reference genomes  
341 using kallisto (--pseudobam)<sup>27,28</sup>. Reads aligning to the 16S/23S ribosomal RNA region were  
342 removed. Microbial abundance was quantified as Molecules per Million reads (MPM):

$$343 \quad MPM = \frac{\text{Microbial Reads} \times 10^6}{\text{Total Reads}}.$$

344

345

### 346 *Quantification of insertion sequence and genome coverage*

347 Reads that did not align to the human and phiX references were extracted and aligned (BW-  
348 mem<sup>26</sup>) to the circularized *M. tuberculosis* H37Rv genome (edited from NC\_000962.3), to the  
349 IS6110 and IS1081 sequences retrieved from the GenBank repository for *M. tuberculosis*  
350 H37Rv (NC\_000962.3), and to additional nontuberculous mycobacteria-specific insertion  
351 sequences (**Table S7**). Reads aligning with a minimum mapping quality of 30 were extracted,  
352 and the lengths computed as the absolute difference between the start and end coordinates.  
353 The coverage was calculated using the following equation:

$$354 \quad \text{coverage} = \frac{\Sigma(N \cdot L)}{G \cdot c},$$

355 where  $N$  is the number of reads of length  $L$ ,  $G$  is the sequence length, and  $c$  is the sequence  
356 copy number.

357

### 358 *ROC analysis*

359 Receiver operating characteristic analyses were performed using the *roc* function the R  
360 package pROC<sup>29</sup>. For each biofluid, the abundance of *M. tuberculosis* DNA (in MPM) was  
361 compared between sputum positive tuberculosis and sputum negative tuberculosis samples,  
362 between tuberculosis and endemic cohorts, and between tuberculosis and non-endemic  
363 cohorts.

364

365 To evaluate the effects of using non-endemic and endemic samples on the diagnostic  
366 performance for tuberculosis, reads that aligned to *M. tuberculosis* were extracted from each  
367 sample. Sputum positive tuberculosis samples were compared to a known mixture of sputum  
368 negative tuberculosis samples and either non-endemic or endemic samples. For each of 50  
369 sampling rounds, 15 samples were randomly chosen for ROC analysis.

370

### 371 *Simulating microbial DNA reads*

372 Paired-end reads were simulated according to microbial cfDNA fragment length distribution from  
373 the *M. tuberculosis* H37Rv (NC\_000962.3), *M. bovis* BCG str. Pasteur 1173P2 genome  
374 (NC\_008769.1), and *M. avium* subsp. *Hominissuis* strain OCU464 (NZ\_CP009360.4) genomes  
375 using a custom python script.

376

### 377 *Statistical analysis and data availability*

378 All statistical analyses were performed in R 3.5.0. Boxes in the boxplots indicate the 25th and  
379 75th percentiles, the band in the box represents the median, and whiskers extend to 1.5 x  
380 interquartile range of the hinge. The sequence data for the non-endemic urine cohort was  
381 deposited in the database of Genotypes and Phenotypes (dbGaP, accession number  
382 phs001564v3.p1). The sequence data for the non-endemic plasma cohort was deposited in the  
383 Sequence Read Archive (accession number PRJNA263522). The sequence data generated in  
384 the scope of this study will be deposited in the Sequence Read Archive.

385

### 386 **Acknowledgments**

387 This work was supported by NIH Awards 1DP2AI138242 (to I.D.V.), R01AI146165 (to I.D.V.),  
388 1R01AI151059 (to I.D.V.), a Synergy award from the Rainin Foundation (to I.D.V.), and a grant

389 from the Bill and Melinda Gates Foundation INV-003145 (to I.D.V.). A.C. was supported by the  
390 National Institutes of Health under the Ruth L. Kirschstein National Research Service Award  
391 (6T32GM008267) from the National Institute of General Medical Sciences. P.B. was supported  
392 by the National Science Foundation under the Graduate Research Fellowships Program (DGE-  
393 1144153). A special thanks to the late Dr. Anna Lena Lopez for her research supervision with  
394 the Institute of Child Health and Human Development at the University of the Philippines  
395 Manila's National Institutes of Health for samples collected and characterized in Manila,  
396 Philippines.

397

### 398 **Author's Contributions**

399 A. Chang, A.S., and I.D.V. contributed to the study design. A. Chang, O.M., L.D.K., J.L., and  
400 P.B. performed the experiments. A Chang, P.K., and I.D.V. analyzed the data. A.A., A.  
401 Cattamanchi, C.M.B., and J.C. facilitated data collection. A. Chang and I.D.V. wrote the  
402 manuscript. All authors provided comments and edits.

403

### 404 **Conflicts of interest**

405 I.D.V. has received research grants from the Bill and Melinda Gates Foundation, the National  
406 Institutes of Health, and the Rainin Foundation. P.B. has received research grants from the  
407 National Science Foundation. I.D.V. and P.B. are inventors on the patent US-2020-0048713-A1  
408 titled "Methods of Detecting Cell-Free DNA in Biological Samples". The rights to the patent were  
409 licensed by Eurofins through Cornell University. I.D.V. is a Member of the Advisory Board and  
410 has stock in Karius Inc.

411

### 412 **Role of the funding source**

413 The funders of the study had no role in study design, data collection, data analysis, data  
414 interpretation, or writing of the report.



415 **References**

- 416 1. Chakaya, J. *et al.* Global Tuberculosis Report 2020 – Reflections on the Global TB burden,  
417 treatment and prevention efforts. *Int. J. Infect. Dis.* S1201971221001934 (2021)  
418 doi:10.1016/j.ijid.2021.02.107.
- 419 2. Moore, D. F., Guzman, J. A. & Mikhail, L. T. Reduction in turnaround time for laboratory  
420 diagnosis of pulmonary tuberculosis by routine use of a nucleic acid amplification test.  
421 *Diagn. Microbiol. Infect. Dis.* **52**, 247–254 (2005).
- 422 3. Ismail, N. A. *et al.* Optimizing Mycobacterial Culture in Smear-Negative, Human  
423 Immunodeficiency Virus-Infected Tuberculosis Cases. *PLOS ONE* **10**, e0141851 (2015).
- 424 4. Bowness, R. *et al.* The relationship between Mycobacterium tuberculosis MGIT time to  
425 positivity and cfu in sputum samples demonstrates changing bacterial phenotypes  
426 potentially reflecting the impact of chemotherapy on critical sub-populations. *J. Antimicrob.*  
427 *Chemother.* **70**, 448–455 (2015).
- 428 5. Fernández-Carballo, B. L., Broger, T., Wyss, R., Banaei, N. & Denkinger, C. M. Toward the  
429 Development of a Circulating Free DNA-Based In Vitro Diagnostic Test for Infectious  
430 Diseases: a Review of Evidence for Tuberculosis. *J. Clin. Microbiol.* **57**, e01234-18.
- 431 6. Oreskovic, A. *et al.* Diagnosing Pulmonary Tuberculosis by Using Sequence-Specific  
432 Purification of Urine Cell-Free DNA. *J. Clin. Microbiol.* **59**, e00074-21.
- 433 7. Oreskovic, A. *et al.* Characterizing the molecular composition and diagnostic potential of  
434 Mycobacterium tuberculosis urinary cell-free DNA using next-generation sequencing. *Int. J.*  
435 *Infect. Dis. IJID Off. Publ. Int. Soc. Infect. Dis.* **112**, 330–337 (2021).
- 436 8. Denkinger, C. M. *et al.* Guidance for the Evaluation of Tuberculosis Diagnostics That Meet  
437 the World Health Organization (WHO) Target Product Profiles: An Introduction to WHO  
438 Process and Study Design Principles. *J. Infect. Dis.* **220**, S91–S98 (2019).
- 439 9. Burnham, P. *et al.* Single-stranded DNA library preparation uncovers the origin and diversity  
440 of ultrashort cell-free DNA in plasma. *Sci. Rep.* **6**, 27859 (2016).

- 441 10. Chang, A. *et al.* Measurement Biases Distort Cell-Free DNA Fragmentation Profiles and  
442 Define the Sensitivity of Metagenomic Cell-Free DNA Sequencing Assays. *Clin. Chem.*  
443 (2021) doi:10.1093/clinchem/hvab142.
- 444 11. Daksis, J. I. & Erikson, G. H. Heteropolymeric Triplex-Based Genomic Assay® to Detect  
445 Pathogens or Single-Nucleotide Polymorphisms in Human Genomic Samples. *PLOS ONE*  
446 **2**, e305 (2007).
- 447 12. Burnham, P. *et al.* Urinary cell-free DNA is a versatile analyte for monitoring infections of the  
448 urinary tract. *Nat. Commun.* **9**, 2412 (2018).
- 449 13. De Vlaminck, I. *et al.* Noninvasive monitoring of infection and rejection after lung  
450 transplantation. *Proc. Natl. Acad. Sci. U. S. A.* **112**, 13336–13341 (2015).
- 451 14. De Vlaminck, I. *et al.* Temporal response of the human virome to immunosuppression and  
452 antiviral therapy. *Cell* **155**, 1178–1187 (2013).
- 453 15. Gupta, V. K., Paul, S. & Dutta, C. Geography, Ethnicity or Subsistence-Specific Variations in  
454 Human Microbiome Composition and Diversity. *Front. Microbiol.* **8**, 1162 (2017).
- 455 16. van Seventer, J. M. & Hochberg, N. S. Principles of Infectious Diseases: Transmission,  
456 Diagnosis, Prevention, and Control. *Int. Encycl. Public Health* 22–39 (2017)  
457 doi:10.1016/B978-0-12-803678-5.00516-6.
- 458 17. Adikaram, C. P. Overview of Non Tuberculosis Mycobacterial Lung Diseases. in  
459 *Mycobacterium: Research and Development* (IntechOpen, 2018).
- 460 18. Garnier, T. *et al.* The complete genome sequence of *Mycobacterium bovis*. *Proc. Natl.*  
461 *Acad. Sci.* **100**, 7877–7882 (2003).
- 462 19. Tanaka, M. M., Rosenberg, N. A. & Small, P. M. The control of copy number of IS6110 in  
463 *Mycobacterium tuberculosis*. *Mol. Biol. Evol.* **21**, 2195–2201 (2004).
- 464 20. van Soolingen, D., Hermans, P. W., de Haas, P. E. & van Embden, J. D. Insertion element  
465 IS1081-associated restriction fragment length polymorphisms in *Mycobacterium*

- 466 tuberculosis complex species: a reliable tool for recognizing *Mycobacterium bovis* BCG. *J.*  
467 *Clin. Microbiol.* **30**, 1772–1777 (1992).
- 468 21. Primm, T. P., Lucero, C. A. & Falkinham, J. O. Health Impacts of Environmental  
469 Mycobacteria. *Clin. Microbiol. Rev.* **17**, 98–106 (2004).
- 470 22. Oreskovic, A. & Lutz, B. R. Ultrasensitive hybridization capture: Reliable detection of <1  
471 copy/mL short cell-free DNA from large-volume urine samples. *PLOS ONE* **16**, e0247851  
472 (2021).
- 473 23. Labugger, I. *et al.* Detection of transrenal DNA for the diagnosis of pulmonary tuberculosis  
474 and treatment monitoring. *Infection* **45**, 269–276 (2017).
- 475 24. Melkonyan, H. S. *et al.* Transrenal Nucleic Acids: From Proof of Principle to Clinical Tests.  
476 *Ann. N. Y. Acad. Sci.* **1137**, 73–81 (2008).
- 477 25. Bolger, A. M., Lohse, M. & Usadel, B. Trimmomatic: a flexible trimmer for Illumina sequence  
478 data. *Bioinformatics* **30**, 2114–2120 (2014).
- 479 26. Li, H. & Durbin, R. Fast and accurate short read alignment with Burrows-Wheeler transform.  
480 *Bioinforma. Oxf. Engl.* **25**, 1754–1760 (2009).
- 481 27. Bray, N. L., Pimentel, H., Melsted, P. & Pachter, L. Near-optimal probabilistic RNA-seq  
482 quantification. *Nat. Biotechnol.* **34**, 525–527 (2016).
- 483 28. Schaeffer, L., Pimentel, H., Bray, N., Melsted, P. & Pachter, L. Pseudoalignment for  
484 metagenomic read assignment. *Bioinformatics* **33**, 2082–2088 (2017).
- 485 29. Robin, X. *et al.* pROC: an open-source package for R and S+ to analyze and compare ROC  
486 curves. *BMC Bioinformatics* **12**, 77 (2011).
- 487

**USA**

**Non-endemic control**

Plasma n=40

Urine n=141

**Peru**

**Endemic control**

Plasma n=62

Urine n=23

**Tuberculosis**

Plasma n=61

**Uganda**

**Tuberculosis**

Oral swab n=42

**Philippines**

**Tuberculosis**

Urine n=58

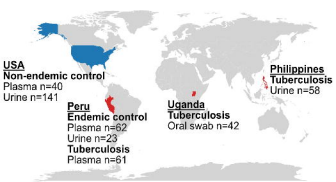

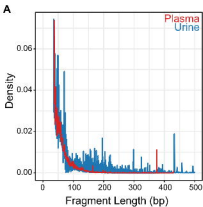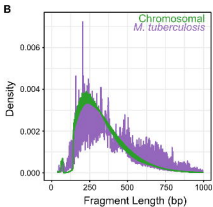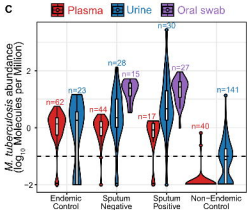

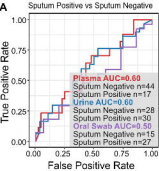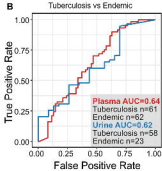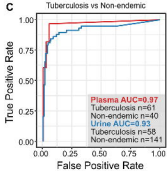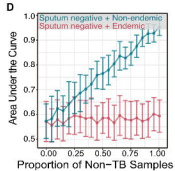



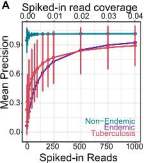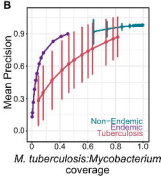

Source: https://medrxiv.org/content/10.1101/2022.04.15.22273912v1.full.pdf
